# Supplementary material for: Hospital antimicrobial stewardship: profiling the oral microbiome after exposure to COVID-19 and antibiotics
Source: PubMed Central journal article supplement (PMC10927822; doi:10.3389/fmicb.2024.1346762), 2024-02-27
Supplement: Data_Sheet_1.pdf [file Data_Sheet_1.pdf]

# SUPPLEMENTARY MATERIALS FOR

## Hospital Antimicrobial Stewardship: Profiling the Oral Microbiome After Exposure to COVID and Antibiotics

Patricia Buendia<sup>1\*</sup>, Krystal Fernandez<sup>1</sup>, Castle Raley<sup>2</sup>, Ali Rahnavard<sup>3</sup>, Keith A. Crandall<sup>2,3</sup>, Jose Guillermo Castro<sup>4</sup>

<sup>1</sup>Lifetime Omics, Miami, FL 33133

<sup>2</sup>The GWU Genomics Core, Milken Institute School of Public Health, The George Washington University, Washington, DC 20052

<sup>3</sup>Computational Biology Institute, Department of Biostatistics and Bioinformatics, Milken Institute School of Public Health, The George Washington University, Washington, DC 20052

<sup>4</sup>Division of Infectious Diseases, Leonard M. Miller School of Medicine, University of Miami, Miami, FL 33136

### **This PDF file includes:**

**Figure S1.** Study Workflow

**Figure S2.** Collinearity between metadata variables including clinical and patient characteristics.

**Figure S3.** Alpha and Beta diversity associated with Broad-Spectrum Sepsis Antibiotics (BSA) for all patients and 5 healthy subjects

**Figure S4.** Bacterial Microbiome Beta Diversity at the Genus Level

**Figure S5.** Bacterial Microbiome Alpha Diversity at the Genus Level

**Figure S6.** Alpha Diversity at the Family level by Disease Severity groups of DNA Viruses, Fungi and Parasites

**Figure S7.** Species Alpha Diversity by BSA groups of **(a)** Fungi and Parasites **(b)** DNA Viruses

**Figure S8.** Maaslin Boxplots showing antimicrobial resistance differences between BSA groups

Other supplementary materials for this manuscript include the following:

**Table S1.** P-values for Correlations shown in Figure S2

MetadataCorrelation\_Pvalue.xlsx

**Table S2.** Outcome for 4 False Positives

Supp-Table-4-false-positives-outcome-antibiotics.xlsx

**Table S3.** Nextflow nf-core/viralrecon variant analysis

Coverage-variants.xlsx

**Table S4.** Microbiome read counts by Biobakery (BB) and Kraken (K) and Respiratory Virome Sequencing (RVOP) read counts and genome coverage

Kraken-Biobakery-Read-Stats-Supp-Material-deid.xlsx

**Table S5.** Severity and Controls at Species Level - Significantly reduced bacteria at the species level in COVID-19 compared to healthy subjects (controls)

AR\_Maaslin2\_Species\_significant\_results.xlsx

**Table S6.** Severity and Controls at Genus Level- Significantly reduced bacteria at the genus level in COVID-19 compared to healthy subjects (controls)

Masslin\_Severity\_Healthy\_Armstrong\_Genus\_Level\_Significant\_Results.xlsx

**Table S7.** Severity and FPs - Significantly reduced bacterial species in COVID-19 patients as compared to false positives

Maaslin\_Severity\_4FPs\_significant\_results.xlsx

**Table S8.** DNA Virus, fungi, and parasites - Species/Genus - Significant associations between severity of disease and DNA Virus, fungi, and parasites

DNA-Virus-Fungi-Parasites-Severity.xlsx

**Table S9.** BSA and Bacteria - Significantly reduced bacterial species in patients receiving broad-spectrum sepsis antibiotics

Maaslin-sepsis\_bef\_significant\_results.xlsx

**Table S10.** Species Abundance Table Kraken/Bracken

bracken\_c0.1\_combined\_subshell2.S-reid.txt

**Table S11.** Genus Abundance Table Kraken/Bracken

bracken\_c0.1\_combined\_subshell2.G-reid.txt

**Table S12.** Abundance Table Metaphlan

claire\_metaphlan\_concat\_01242022\_merged\_metaphlan\_with\_Armstrong21\_reid.txt

### Figures

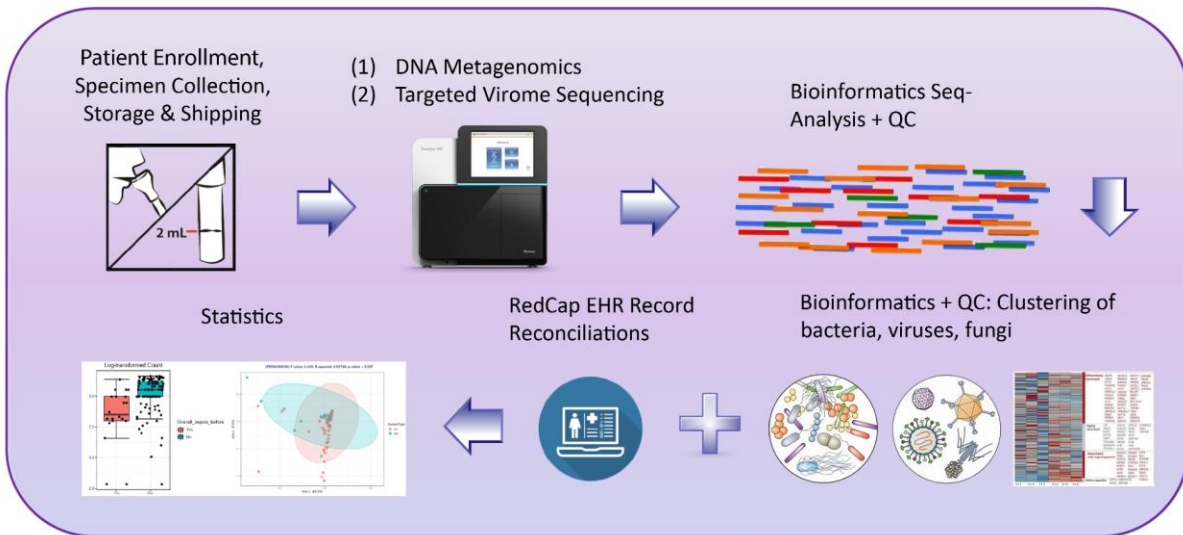

Figure S1. Study Workflow

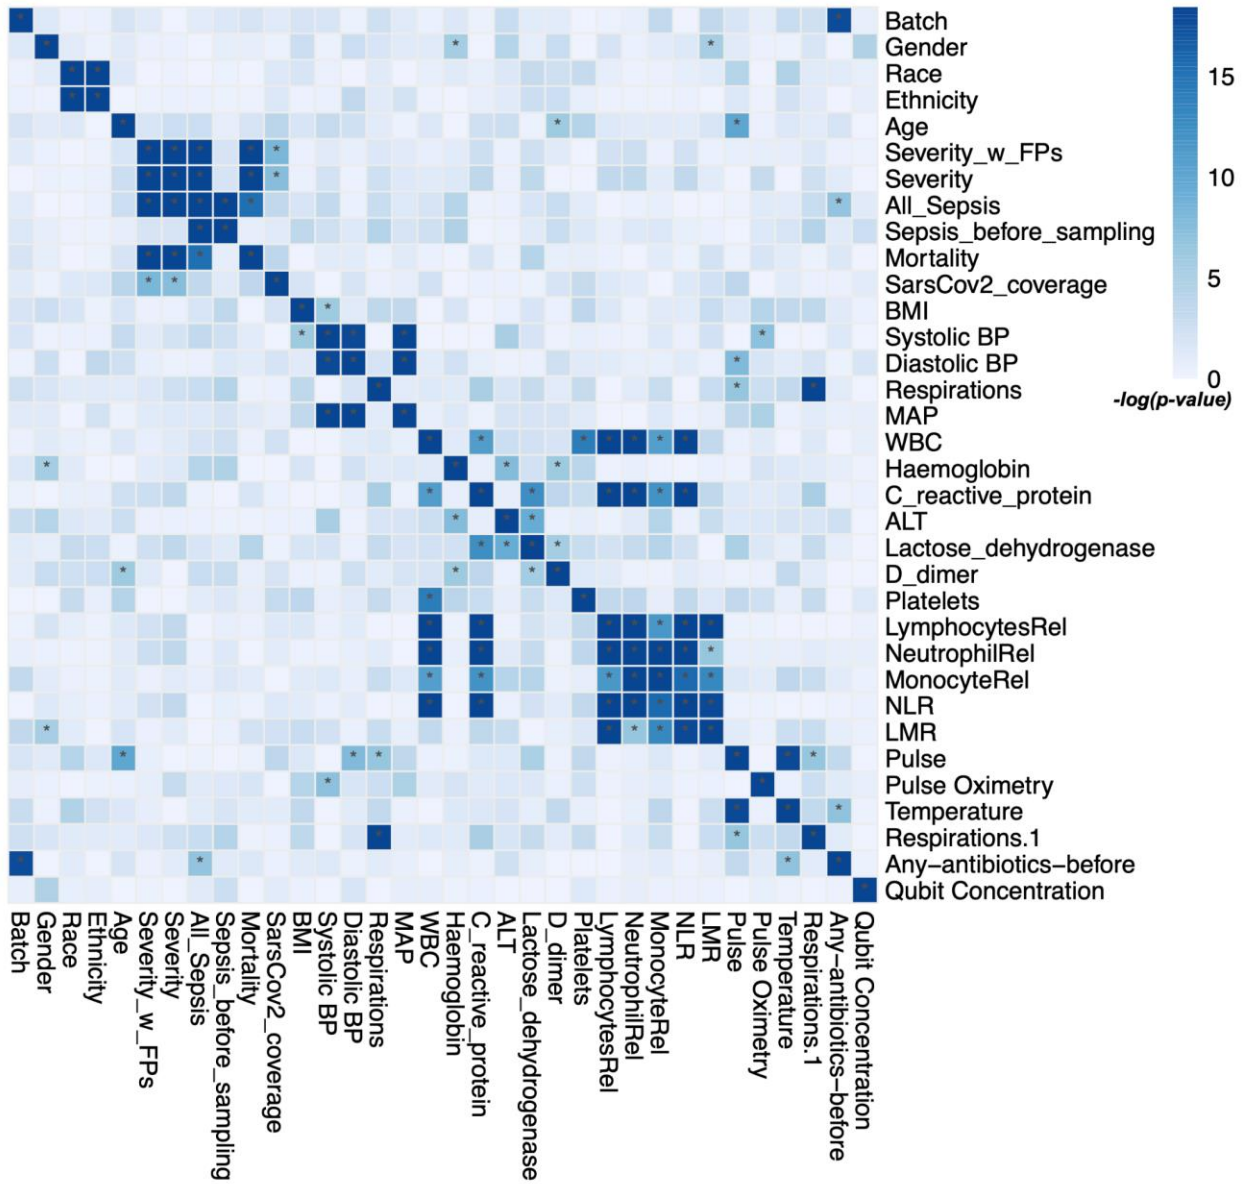

**Figure S2.** Collinearity between metadata variables including clinical and patient characteristics. \* refers to  $p\text{-value} < 0.005$ .  $-\log(p\text{-value})$  of feature correlation has been calculated with three different tests based on data types (Kruskal-Wallis, Spearman, Chi-Squared). For model verification, we observe that race and ethnicity, as well as severity and mortality, as expected, are significantly correlated.

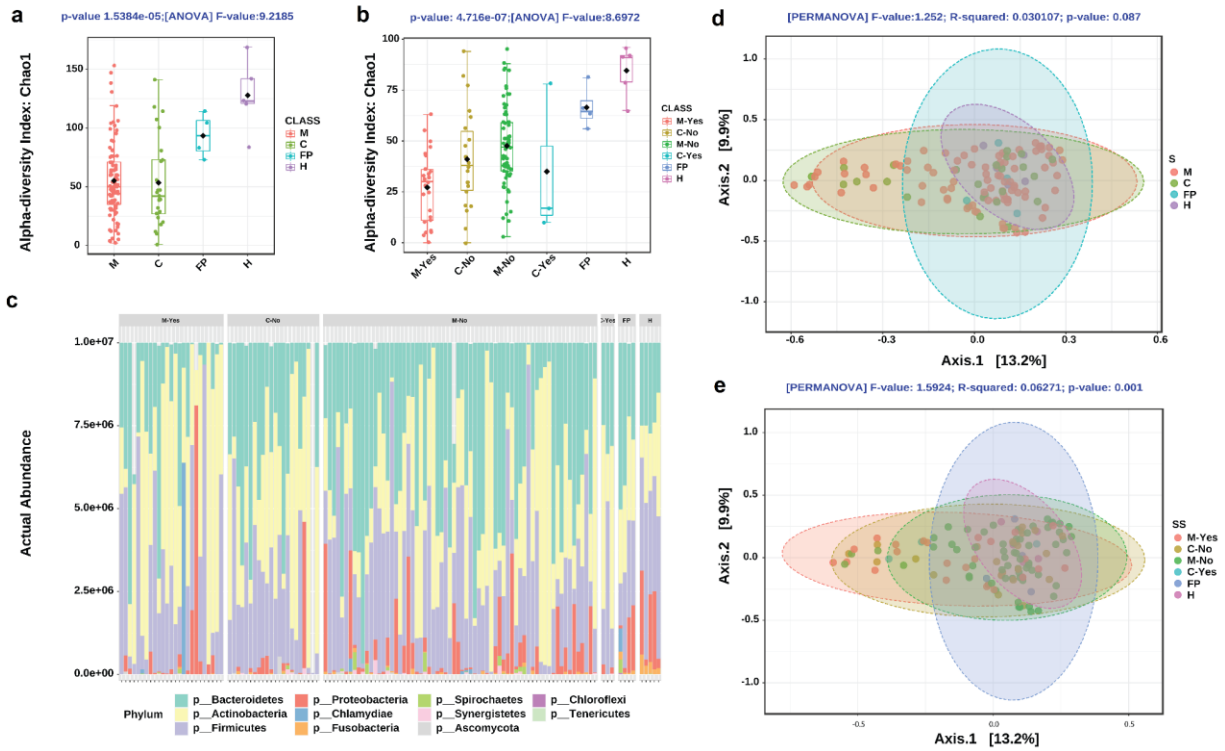

**Figure S3. a.** Alpha diversity boxplots for four groups: moderate (M) and critical (C) COVID-19 groups, false positives (FP), and healthy/control (H) groups. **b.** Alpha diversity boxplots with COVID-19 groups stratified by BSA timing [BSA before or same day as saliva sampling: Yes (Y), No (N)]. **c.** Phyla Abundance Plot. **d.** Beta diversity PCA graphs for the four groups. **e.** Beta diversity PCA graphs with COVID-19 groups stratified by BSA timing.

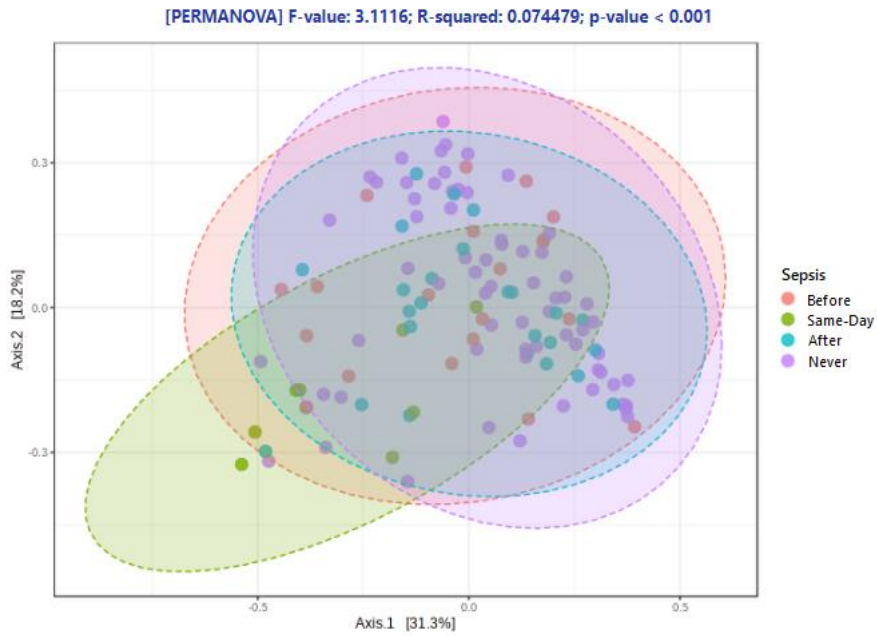

**Figure S4.** Bacterial Microbiome Beta Diversity at the Genus Level

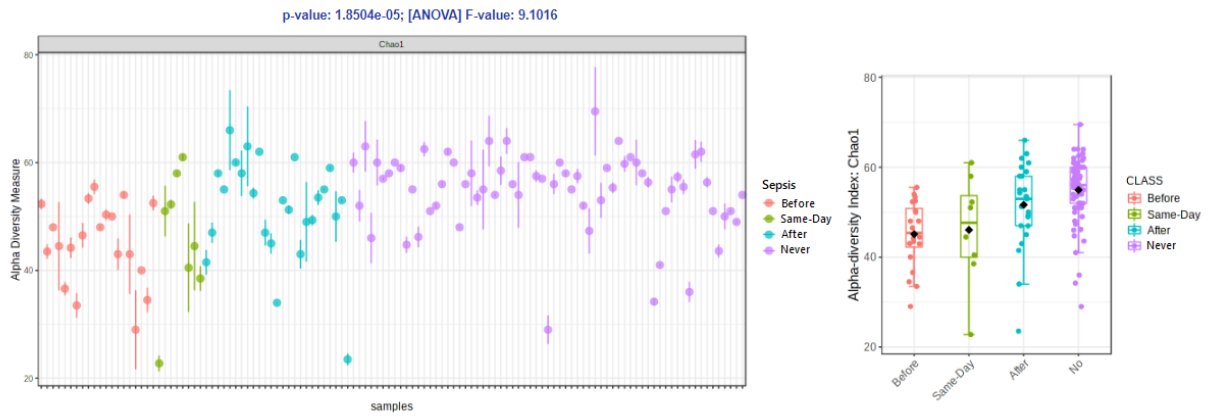

**Figure S5.** Bacterial Microbiome Alpha Diversity at the Genus Level

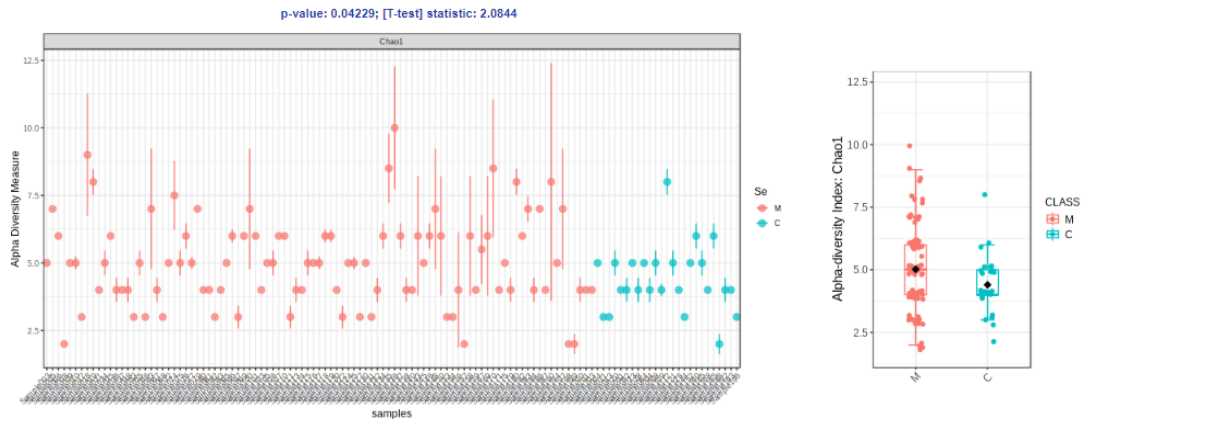

**Figure S6.** Alpha Diversity of DNA Virus, Fungi and Parasite at the family level by Disease Severity groups (M: Moderate, C: Critical)

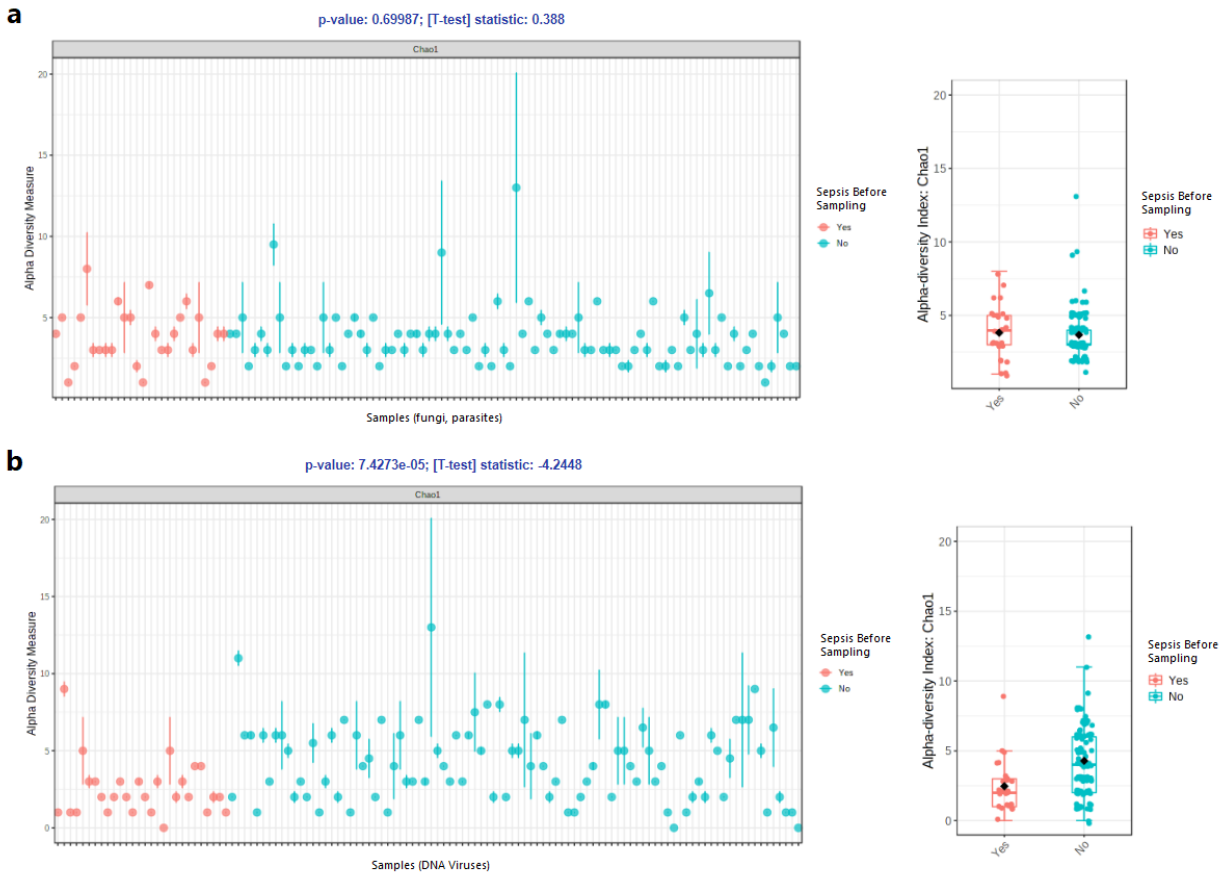

**Figure S7. a** Alpha Diversity of Fungi and Parasite Species by BSA groups (Yes: Early BSA, No: Early BSA) **b** Alpha Diversity of DNA Virus Species by BSA groups

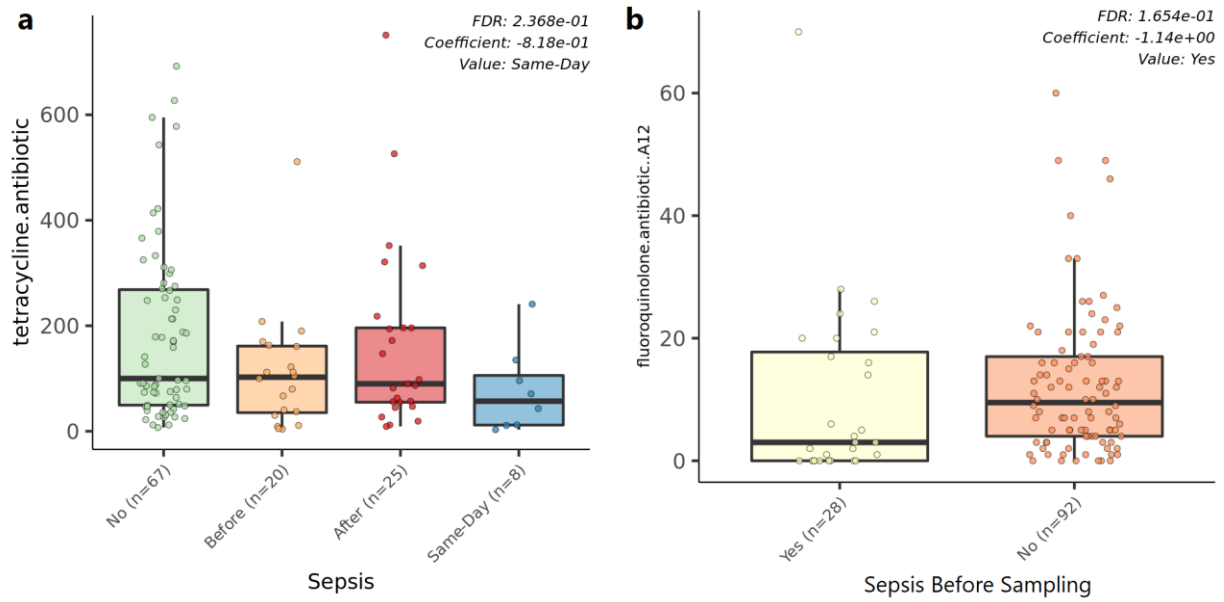

**Figure S8. a** Maaslin Boxplots showing abundance of genes with tetracycline resistance among the 4 sepsis BSA groups (Early BSA: Before and Same-Day), **b** Maaslin Boxplots comparing mixed class fluoroquinolone and tetracycline (A12) resistance to among the 2 sepsis BSA groups (Yes: Early BSA, No: No Early BSA)
